# Supplementary material
Source: HighWire-hosted journal article supplement (https://bmjleader.bmj.com/highwire/filestream/2000/field_highwire_adjunct_files/1/leader-2021-000497supp002_data_supplement.pdf)
Supplement: leader-2021-000497supp002_data_supplement.pdf [file leader-2021-000497supp002_data_supplement.pdf]

## Supplemental Material 2: Theming Tables.

Associated Article: What does the Covid-19 leadership experience teach us about healthcare leadership development?

Authors: Behget, E. Modi, C.

Final Coding Tables and Thematic Map (following updated search strategy)

| Publisher - author          | Link                                                                                                                                                                                                                                                                                                                        | Code                         | Sub theme  | Theme                        |
|-----------------------------|-----------------------------------------------------------------------------------------------------------------------------------------------------------------------------------------------------------------------------------------------------------------------------------------------------------------------------|------------------------------|------------|------------------------------|
| NHS Confederation – Dickson | <a href="https://www.nhsconfed.org/articles/how-do-nhs-leaders-feel-amid-crisis">https://www.nhsconfed.org/articles/how-do-nhs-leaders-feel-amid-crisis</a>                                                                                                                                                                 | Well-being                   | Challenges | Creating systems for support |
| BMJ Leader – Allwood et al  | <a href="https://bmjleader.bmj.com/content/4/2/80">https://bmjleader.bmj.com/content/4/2/80</a>                                                                                                                                                                                                                             | Care                         | Challenges | Creating systems for support |
| BMJ Leader – Geiger et al   | <a href="https://bmjleader.bmj.com/content/4/3/113">https://bmjleader.bmj.com/content/4/3/113</a>                                                                                                                                                                                                                           | Exhaustion                   | Challenges | Creating systems for support |
| BMJ Leader – Symons         | <a href="https://blogs.bmj.com/bmjleader/2020/05/06/decisions-decisions-decisions-is-the-concept-of-decision-fatigue-an-issue-in-covid-19-times-by-rita-symons/">https://blogs.bmj.com/bmjleader/2020/05/06/decisions-decisions-decisions-is-the-concept-of-decision-fatigue-an-issue-in-covid-19-times-by-rita-symons/</a> | Decision Fatigue             | Challenges | Creating systems for support |
| BPS – Highfield et al       | <a href="https://www.bps.org.uk/sites/www.bps.org.uk/files/News/News%20-%20Files/Psychological%20needs%20of%20healthcare%20staff.pdf">https://www.bps.org.uk/sites/www.bps.org.uk/files/News/News%20-%20Files/Psychological%20needs%20of%20healthcare%20staff.pdf</a>                                                       | Fatigue                      | Challenges | Creating systems for support |
| BPS – Highfield et al       | <a href="https://www.bps.org.uk/sites/www.bps.org.uk/files/News/News%20-%20Files/Psychological%20needs%20of%20healthcare%20staff.pdf">https://www.bps.org.uk/sites/www.bps.org.uk/files/News/News%20-%20Files/Psychological%20needs%20of%20healthcare%20staff.pdf</a>                                                       | Recognise compassion fatigue | Challenges | Creating systems for support |

|                                   |                                                                                                                                                                                                                                                                                                                             |                             |                    |                              |
|-----------------------------------|-----------------------------------------------------------------------------------------------------------------------------------------------------------------------------------------------------------------------------------------------------------------------------------------------------------------------------|-----------------------------|--------------------|------------------------------|
| BPS – Highfield et al             | <a href="https://www.bps.org.uk/sites/www.bps.org.uk/files/News/News%20-%20Files/Psychological%20needs%20of%20healthcare%20staff.pdf">https://www.bps.org.uk/sites/www.bps.org.uk/files/News/News%20-%20Files/Psychological%20needs%20of%20healthcare%20staff.pdf</a>                                                       | Recognise exhaustion        | Challenges         | Creating systems for support |
| Kings fund – Bailey and West      | <a href="https://www.kingsfund.org.uk/blog/2020/03/covid-19-crisis-compassionate-leadership">https://www.kingsfund.org.uk/blog/2020/03/covid-19-crisis-compassionate-leadership</a>                                                                                                                                         | Care                        | Challenges         | Creating systems for support |
| BMJ Leader – Pandit and Berendt   | <a href="https://bmjleader.bmj.com/content/early/2020/05/25/leader-2020-000291">https://bmjleader.bmj.com/content/early/2020/05/25/leader-2020-000291</a>                                                                                                                                                                   | Difficulty coping with loss | Challenges         | Creating systems for support |
| BMJ Leader – Stoddart and Berendt | <a href="https://bmjleader.bmj.com/content/4/2/92">https://bmjleader.bmj.com/content/4/2/92</a>                                                                                                                                                                                                                             | Resilience and balance      | Care and self-care | Creating systems for support |
| BMJ Leader – Marx                 | <a href="https://blogs.bmj.com/bmjleader/2020/04/15/compassionate-leadership-is-not-a-nice-to-have-for-clinicians-confronting-covid-19-it-is-a-powerful-weapon/">https://blogs.bmj.com/bmjleader/2020/04/15/compassionate-leadership-is-not-a-nice-to-have-for-clinicians-confronting-covid-19-it-is-a-powerful-weapon/</a> | Compassion                  | Care and self-care | Creating systems for support |
| Kings fund – Bailey and West      | <a href="https://www.kingsfund.org.uk/blog/2020/03/covid-19-crisis-compassionate-leadership">https://www.kingsfund.org.uk/blog/2020/03/covid-19-crisis-compassionate-leadership</a>                                                                                                                                         | Self-care                   | Care and Self-care | Creating systems for support |
| NHS Confederation – Kumar         | <a href="https://www.nhsconfed.org/articles/leadership-crisis-importance-courage-and-caring">https://www.nhsconfed.org/articles/leadership-crisis-importance-courage-and-caring</a>                                                                                                                                         | Self-care                   | Care and Self-care | Creating systems for support |
| BPS – Highfield et al             | <a href="https://www.bps.org.uk/sites/www.bps.org.uk/files/News/News%20-%20Files/Psychological%20needs%20of%20healthcare%20staff.pdf">https://www.bps.org.uk/sites/www.bps.org.uk/files/News/News%20-%20Files/Psychological%20needs%20of%20healthcare%20staff.pdf</a>                                                       | Care for the carers         | Care and Self-care | Creating systems for support |
| Kings fund – Issar                | <a href="https://www.kingsfund.org.uk/audio-video/why-leadership-important-covid-prerana-issar">https://www.kingsfund.org.uk/audio-video/why-leadership-important-covid-prerana-issar</a>                                                                                                                                   | Leaders need self-care      | Care and Self-care | Creating systems for support |

|                                        |                                                                                                                                                                                         |                                                   |                    |                              |
|----------------------------------------|-----------------------------------------------------------------------------------------------------------------------------------------------------------------------------------------|---------------------------------------------------|--------------------|------------------------------|
| Kings fund - Maggs                     | <a href="https://www.kingsfund.org.uk/publications/resources-supporting-mental-health-covid19">https://www.kingsfund.org.uk/publications/resources-supporting-mental-health-covid19</a> | Resources supporting mental health and well-being | Care and Self-care | Creating systems for support |
| Kings fund - Benson                    | <a href="https://www.kingsfund.org.uk/publications/managing-anxiety-breathing">https://www.kingsfund.org.uk/publications/managing-anxiety-breathing</a>                                 | Managing breathing for self-care                  | Care and Self-care | Creating systems for support |
| Kings fund - Maybin                    | <a href="https://www.kingsfund.org.uk/publications/managing-anxiety-about-loss-covid-19">https://www.kingsfund.org.uk/publications/managing-anxiety-about-loss-covid-19</a>             | Managing anxiety                                  | Care and Self-care | Creating systems for support |
| Kings fund - Newitt                    | <a href="https://www.kingsfund.org.uk/publications/managing-your-energy-covid19">https://www.kingsfund.org.uk/publications/managing-your-energy-covid19</a>                             | Managing energy                                   | Care and Self-care | Creating systems for support |
| Kings fund - Berwick                   | <a href="https://www.kingsfund.org.uk/audio-video/don-berwick-responding-covid-19-crisis">https://www.kingsfund.org.uk/audio-video/don-berwick-responding-covid-19-crisis</a>           | Self-care                                         | Care and Self-care | Creating systems for support |
| BMJ leader – Mountford and Berendt     | <a href="https://bmjleader.bmj.com/content/early/2020/05/04/leader-2020-000272">https://bmjleader.bmj.com/content/early/2020/05/04/leader-2020-000272</a>                               | Compassion looking out for each other             | Care and Self-care | Creating systems for support |
| BMJ leader – Mountford and Berendt     | <a href="https://bmjleader.bmj.com/content/early/2020/05/04/leader-2020-000272">https://bmjleader.bmj.com/content/early/2020/05/04/leader-2020-000272</a>                               | Compassion/System culture                         | Care and Self-care | Creating systems for support |
| NHS Confederation – Clinical Directors | <a href="https://www.nhsconfed.org/articles/leading-ocns-through-pandemic">https://www.nhsconfed.org/articles/leading-ocns-through-pandemic</a>                                         | Leaders are human too                             | Care and Self-care | Creating systems for support |
| NHS Confederation – Clinical Directors | <a href="https://www.nhsconfed.org/articles/leading-ocns-through-pandemic">https://www.nhsconfed.org/articles/leading-ocns-through-pandemic</a>                                         | Allow others to take the lead                     | Care and Self-care | Creating systems for support |

|                                                  |                                                                                                                                                                                                                                                                               |                                                  |                    |                              |
|--------------------------------------------------|-------------------------------------------------------------------------------------------------------------------------------------------------------------------------------------------------------------------------------------------------------------------------------|--------------------------------------------------|--------------------|------------------------------|
| NHS Confederation – Clinical Directors           | <a href="https://www.nhsconfed.org/articles/leading-pcns-through-pandemic">https://www.nhsconfed.org/articles/leading-pcns-through-pandemic</a>                                                                                                                               | Self-care                                        | Care and Self-care | Creating systems for support |
| Kings Fund - Covid Trauma Response working group | <a href="https://www.kingsfund.org.uk/audio-video/stress-hospital-staff-covid-19">https://www.kingsfund.org.uk/audio-video/stress-hospital-staff-covid-19</a>                                                                                                                 | Supporting well-being                            | Leader behaviour   | Creating systems for support |
| BMJ Leader – Vogus and McClennan                 | <a href="https://bmjleader.bmj.com/content/4/2/48">https://bmjleader.bmj.com/content/4/2/48</a>                                                                                                                                                                               | Compassion tips (culture of compassion included) | Leader behaviour   | Creating systems for support |
| BMJ Leader – Reckless and Berendt                | <a href="https://bmjleader.bmj.com/content/4/2/90">https://bmjleader.bmj.com/content/4/2/90</a>                                                                                                                                                                               | Be mindful of all staff groups                   | Leader behaviour   | Creating systems for support |
| BMJ Leader – Hardacre and Margetts               | <a href="https://blogs.bmj.com/bmjleader/2020/04/15/psychological-ppe-survival-kit-for-creating-a-safer-culture-in-the-covid-19-context/">https://blogs.bmj.com/bmjleader/2020/04/15/psychological-ppe-survival-kit-for-creating-a-safer-culture-in-the-covid-19-context/</a> | Tips for Care and safer culture                  | Leader Behaviour   | Creating systems for support |
| BMJ Leader – Steward                             | <a href="https://blogs.bmj.com/bmjleader/2020/05/13/maintaining-humanity-in-the-covid-19-crisis-by-dr-katy-steward/">https://blogs.bmj.com/bmjleader/2020/05/13/maintaining-humanity-in-the-covid-19-crisis-by-dr-katy-steward/</a>                                           | Techniques to support well-being                 | Leader Behaviour   | Creating systems for support |
| BMJ Leader – Ojo                                 | <a href="https://blogs.bmj.com/bmjleader/2020/05/20/mental-health-awareness-for-a-week-then-what-by-dr-tim-ojo/">https://blogs.bmj.com/bmjleader/2020/05/20/mental-health-awareness-for-a-week-then-what-by-dr-tim-ojo/</a>                                                   | Supporting kindness                              | Leader Behaviour   | Creating systems for support |
| Kings fund – Bailey and West                     | <a href="https://www.kingsfund.org.uk/blog/2020/03/covid-19-crisis-compassionate-leadership">https://www.kingsfund.org.uk/blog/2020/03/covid-19-crisis-compassionate-leadership</a>                                                                                           | Look out for each other                          | Leader behaviour   | Creating systems for support |
| Kings fund – Bailey and West                     | <a href="https://www.kingsfund.org.uk/blog/2020/03/covid-19-crisis-compassionate-leadership">https://www.kingsfund.org.uk/blog/2020/03/covid-19-crisis-compassionate-leadership</a>                                                                                           | Care                                             | Leader behaviour   | Creating systems for support |

|                           |                                                                                                                                                                                                                                                                       |                                 |                  |                              |
|---------------------------|-----------------------------------------------------------------------------------------------------------------------------------------------------------------------------------------------------------------------------------------------------------------------|---------------------------------|------------------|------------------------------|
| NHS Confederation - Kumar | <a href="https://www.nhsconfed.org/articles/leadership-crisis-importance-courage-and-caring">https://www.nhsconfed.org/articles/leadership-crisis-importance-courage-and-caring</a>                                                                                   | Care                            | Leader behaviour | Creating systems for support |
| BMJ Leader - Pandit       | <a href="https://bmjleader.bmj.com/content/early/2020/05/25/leader-2020-000291">https://bmjleader.bmj.com/content/early/2020/05/25/leader-2020-000291</a>                                                                                                             | Support                         | Leader behaviour | Creating systems for support |
| Kings fund - Evans        | <a href="https://www.kingsfund.org.uk/audio-video/nurturing-leadership-navina-evans">https://www.kingsfund.org.uk/audio-video/nurturing-leadership-navina-evans</a>                                                                                                   | Supportive                      | Leader behaviour | Creating systems for support |
| BPS – Highfield et al     | <a href="https://www.bps.org.uk/sites/www.bps.org.uk/files/News/News%20-%20Files/Psychological%20needs%20of%20healthcare%20staff.pdf">https://www.bps.org.uk/sites/www.bps.org.uk/files/News/News%20-%20Files/Psychological%20needs%20of%20healthcare%20staff.pdf</a> | Providing care to care for self | Leader behaviour | Creating systems for support |
| BPS – Highfield et al     | <a href="https://www.bps.org.uk/sites/www.bps.org.uk/files/News/News%20-%20Files/Psychological%20needs%20of%20healthcare%20staff.pdf">https://www.bps.org.uk/sites/www.bps.org.uk/files/News/News%20-%20Files/Psychological%20needs%20of%20healthcare%20staff.pdf</a> | Support                         | Leader behaviour | Creating systems for support |
| BPS – Highfield et al     | <a href="https://www.bps.org.uk/sites/www.bps.org.uk/files/News/News%20-%20Files/Psychological%20needs%20of%20healthcare%20staff.pdf">https://www.bps.org.uk/sites/www.bps.org.uk/files/News/News%20-%20Files/Psychological%20needs%20of%20healthcare%20staff.pdf</a> | Compassion                      | Leader behaviour | Creating systems for support |
| BPS – Highfield et al     | <a href="https://www.bps.org.uk/sites/www.bps.org.uk/files/News/News%20-%20Files/Psychological%20needs%20of%20healthcare%20staff.pdf">https://www.bps.org.uk/sites/www.bps.org.uk/files/News/News%20-%20Files/Psychological%20needs%20of%20healthcare%20staff.pdf</a> | Allow rest                      | Leader behaviour | Creating systems for support |
| BPS – Highfield et al     | <a href="https://www.bps.org.uk/sites/www.bps.org.uk/files/News/News%20-%20Files/Psychological%20needs%20of%20healthcare%20staff.pdf">https://www.bps.org.uk/sites/www.bps.org.uk/files/News/News%20-%20Files/Psychological%20needs%20of%20healthcare%20staff.pdf</a> | Buddying                        | Leader behaviour | Creating systems for support |
| BPS – Highfield et al     | <a href="https://www.bps.org.uk/sites/www.bps.org.uk/files/News/News%20-%20Files/Psychological%20needs%20of%20healthcare%20staff.pdf">https://www.bps.org.uk/sites/www.bps.org.uk/files/News/News%20-%20Files/Psychological%20needs%20of%20healthcare%20staff.pdf</a> | Access to protected spaces      | Leader behaviour | Creating systems for support |

|                               |                                                                                                                                                                                                                                                                       |                                   |                  |                              |
|-------------------------------|-----------------------------------------------------------------------------------------------------------------------------------------------------------------------------------------------------------------------------------------------------------------------|-----------------------------------|------------------|------------------------------|
| BPS – Highfield et al         | <a href="https://www.bps.org.uk/sites/www.bps.org.uk/files/News/News%20-%20Files/Psychological%20needs%20of%20healthcare%20staff.pdf">https://www.bps.org.uk/sites/www.bps.org.uk/files/News/News%20-%20Files/Psychological%20needs%20of%20healthcare%20staff.pdf</a> | Deliver formal psychological care | Leader behaviour | Creating systems for support |
| Kings fund – Bailey and West  | <a href="https://www.kingsfund.org.uk/blog/2020/03/covid-19-crisis-compassionate-leadership">https://www.kingsfund.org.uk/blog/2020/03/covid-19-crisis-compassionate-leadership</a>                                                                                   | Compassion                        | Leader behaviour | Creating systems for support |
| BMJ Leader – Lees and Berendt | <a href="https://bmjleader.bmj.com/content/4/3/149">https://bmjleader.bmj.com/content/4/3/149</a>                                                                                                                                                                     | Kindness                          | Leader behaviour | Creating systems for support |
| BMJ Leader - Pandit           | <a href="https://bmjleader.bmj.com/content/early/2020/05/25/leader-2020-000291">https://bmjleader.bmj.com/content/early/2020/05/25/leader-2020-000291</a>                                                                                                             | Empathy                           | Leader behaviour | Creating systems for support |
| BMJ Leader - Pandit           | <a href="https://bmjleader.bmj.com/content/early/2020/05/25/leader-2020-000291">https://bmjleader.bmj.com/content/early/2020/05/25/leader-2020-000291</a>                                                                                                             | Kindness                          | Leader behaviour | Creating systems for support |
| BPS – Highfield et al         | <a href="https://www.bps.org.uk/sites/www.bps.org.uk/files/News/News%20-%20Files/Psychological%20needs%20of%20healthcare%20staff.pdf">https://www.bps.org.uk/sites/www.bps.org.uk/files/News/News%20-%20Files/Psychological%20needs%20of%20healthcare%20staff.pdf</a> | Need compassion                   | Leader behaviour | Creating systems for support |

| Publisher - author  | Link                                                                                                                                                      | Code                     | Sub-theme                 | Theme                                                 |
|---------------------|-----------------------------------------------------------------------------------------------------------------------------------------------------------|--------------------------|---------------------------|-------------------------------------------------------|
| BMJ Leader – Dalton | <a href="https://bmjleader.bmj.com/content/early/2020/05/18/leader-2020-000270">https://bmjleader.bmj.com/content/early/2020/05/18/leader-2020-000270</a> | Top down decision        | Top down misunderstanding | The possibilities and dangers of working with urgency |
| BMJ Leader – Dalton | <a href="https://bmjleader.bmj.com/content/early/2020/05/18/leader-2020-000270">https://bmjleader.bmj.com/content/early/2020/05/18/leader-2020-000270</a> | Difficulty with top down | Top down misunderstanding | The possibilities and dangers of                      |

|                               |                                                                                                                                                                                                                                                                       |                                       |                           |                                                       |
|-------------------------------|-----------------------------------------------------------------------------------------------------------------------------------------------------------------------------------------------------------------------------------------------------------------------|---------------------------------------|---------------------------|-------------------------------------------------------|
|                               |                                                                                                                                                                                                                                                                       |                                       |                           | working with urgency                                  |
| BMJ Leader – Dalton           | <a href="https://bmjleader.bmj.com/content/early/2020/05/18/leader-2020-000270">https://bmjleader.bmj.com/content/early/2020/05/18/leader-2020-000270</a>                                                                                                             | Power issue                           | Top down misunderstanding | The possibilities and dangers of working with urgency |
| Kings Fund – Trimble          | <a href="https://www.kingsfund.org.uk/blog/2020/05/im-pact-covid-19-working-relationships">https://www.kingsfund.org.uk/blog/2020/05/im-pact-covid-19-working-relationships</a>                                                                                       | Command and control                   | Top down misunderstanding | The possibilities and dangers of working with urgency |
| Kings Fund – Trimble          | <a href="https://www.kingsfund.org.uk/blog/2020/05/im-pact-covid-19-working-relationships">https://www.kingsfund.org.uk/blog/2020/05/im-pact-covid-19-working-relationships</a>                                                                                       | Lasting impact of command and control | Top down misunderstanding | The possibilities and dangers of working with urgency |
| BMJ leader – Lees and Berendt | <a href="https://bmjleader.bmj.com/content/early/2020/04/30/leader-2020-000265">https://bmjleader.bmj.com/content/early/2020/04/30/leader-2020-000265</a>                                                                                                             | Need inclusive problem solving styles | Top down misunderstanding | The possibilities and dangers of working with urgency |
| BMJ Leader – Dalton           | <a href="https://bmjleader.bmj.com/content/early/2020/05/18/leader-2020-000270">https://bmjleader.bmj.com/content/early/2020/05/18/leader-2020-000270</a>                                                                                                             | Top down misunderstanding             | Top down misunderstanding | The possibilities and dangers of working with urgency |
| BPS – Highfield et al         | <a href="https://www.bps.org.uk/sites/www.bps.org.uk/files/News/News%20-%20Files/Psychological%20needs%20of%20healthcare%20staff.pdf">https://www.bps.org.uk/sites/www.bps.org.uk/files/News/News%20-%20Files/Psychological%20needs%20of%20healthcare%20staff.pdf</a> | Top down misunderstanding             | Top down misunderstanding | The possibilities and dangers of working with urgency |

|                                        |                                                                                                                                                                                           |                                             |                           |                                                       |
|----------------------------------------|-------------------------------------------------------------------------------------------------------------------------------------------------------------------------------------------|---------------------------------------------|---------------------------|-------------------------------------------------------|
| Kings fund – Issar                     | <a href="https://www.kingsfund.org.uk/audio-video/why-leadership-important-covid-prerana-issar">https://www.kingsfund.org.uk/audio-video/why-leadership-important-covid-prerana-issar</a> | Top down misunderstanding                   | Top down misunderstanding | The possibilities and dangers of working with urgency |
| NHS Confederation – Clinical Directors | <a href="https://www.nhsconfed.org/articles/leading-ocns-through-pandemic">https://www.nhsconfed.org/articles/leading-ocns-through-pandemic</a>                                           | Top down misunderstanding                   | Top down misunderstanding | The possibilities and dangers of working with urgency |
| Kings Fund – Collins                   | <a href="https://www.kingsfund.org.uk/publications/discipline-and-agility-crisis">https://www.kingsfund.org.uk/publications/discipline-and-agility-crisis</a>                             | Working with urgency (and need for agility) | How to do it better       | The possibilities and dangers of working with urgency |
| BMJ Leader – Stoller                   | <a href="https://bmjleader.bmj.com/content/4/2/77">https://bmjleader.bmj.com/content/4/2/77</a>                                                                                           | Act quick and create psychological safety   | How to do it better       | The possibilities and dangers of working with urgency |
| Kings fund – Bailey and West           | <a href="https://www.kingsfund.org.uk/blog/2020/03/covid-19-crisis-compassionate-leadership">https://www.kingsfund.org.uk/blog/2020/03/covid-19-crisis-compassionate-leadership</a>       | Appreciating others                         | How to do it better       | The possibilities and dangers of working with urgency |
| Kings fund – Bailey and West           | <a href="https://www.kingsfund.org.uk/blog/2020/03/covid-19-crisis-compassionate-leadership">https://www.kingsfund.org.uk/blog/2020/03/covid-19-crisis-compassionate-leadership</a>       | Autonomy                                    | How to do it better       | The possibilities and dangers of working with urgency |
| Kings fund – Bailey and West           | <a href="https://www.kingsfund.org.uk/blog/2020/03/covid-19-crisis-compassionate-leadership">https://www.kingsfund.org.uk/blog/2020/03/covid-19-crisis-compassionate-leadership</a>       | Control                                     | How to do it better       | The possibilities and dangers of working              |



|                        |                                                                                                                                                                                                                                                                       |                                          |                     |                                                       |
|------------------------|-----------------------------------------------------------------------------------------------------------------------------------------------------------------------------------------------------------------------------------------------------------------------|------------------------------------------|---------------------|-------------------------------------------------------|
|                        |                                                                                                                                                                                                                                                                       |                                          |                     | with urgency                                          |
| BPS – Highfield et al  | <a href="https://www.bps.org.uk/sites/www.bps.org.uk/files/News/News%20-%20Files/Psychological%20needs%20of%20healthcare%20staff.pdf">https://www.bps.org.uk/sites/www.bps.org.uk/files/News/News%20-%20Files/Psychological%20needs%20of%20healthcare%20staff.pdf</a> | Decision making                          | How to do it better | The possibilities and dangers of working with urgency |
| Kings Fund – Harchowal | <a href="https://www.kingsfund.org.uk/audio-video/common-purpose-culture-jatinder-harchowal">https://www.kingsfund.org.uk/audio-video/common-purpose-culture-jatinder-harchowal</a>                                                                                   | Recognising other needs                  | How to do it better | The possibilities and dangers of working with urgency |
| Kings Fund – Harchowal | <a href="https://www.kingsfund.org.uk/audio-video/common-purpose-culture-jatinder-harchowal">https://www.kingsfund.org.uk/audio-video/common-purpose-culture-jatinder-harchowal</a>                                                                                   | Embracing input from others              | How to do it better | The possibilities and dangers of working with urgency |
| Kings Fund – Bullock   | <a href="https://www.kingsfund.org.uk/audio-video/finding-solutions-complex-situations">https://www.kingsfund.org.uk/audio-video/finding-solutions-complex-situations</a>                                                                                             | Putting values at the heart of decisions | How to do it better | The possibilities and dangers of working with urgency |
| Kings fund – Issar     | <a href="https://www.kingsfund.org.uk/audio-video/why-leadership-important-covid-19-erana-issar">https://www.kingsfund.org.uk/audio-video/why-leadership-important-covid-19-erana-issar</a>                                                                           | Need psychological safety                | How to do it better | The possibilities and dangers of working with urgency |
| Kings fund – Issar     | <a href="https://www.kingsfund.org.uk/audio-video/why-leadership-important-covid-19-erana-issar">https://www.kingsfund.org.uk/audio-video/why-leadership-important-covid-19-erana-issar</a>                                                                           | Need inclusive leadership                | How to do it better | The possibilities and dangers of working with urgency |

|                                    |                                                                                                                                                                                                     |                                         |                     |                                                       |
|------------------------------------|-----------------------------------------------------------------------------------------------------------------------------------------------------------------------------------------------------|-----------------------------------------|---------------------|-------------------------------------------------------|
| Kings fund – Issar                 | <a href="https://www.kingsfund.org.uk/audio-video/why-leadership-important-covid-19-issar">https://www.kingsfund.org.uk/audio-video/why-leadership-important-covid-19-issar</a>                     | Distributed leaders                     | How to do it better | The possibilities and dangers of working with urgency |
| Kings fund – Issar                 | <a href="https://www.kingsfund.org.uk/audio-video/why-leadership-important-covid-19-issar">https://www.kingsfund.org.uk/audio-video/why-leadership-important-covid-19-issar</a>                     | Recognise unheard voices                | How to do it better | The possibilities and dangers of working with urgency |
| BMJ leader – Lees and Berendt      | <a href="https://bmjleader.bmj.com/content/early/2020/04/30/leader-2020-000265">https://bmjleader.bmj.com/content/early/2020/04/30/leader-2020-000265</a>                                           | Different type of leadership needed     | How to do it better | The possibilities and dangers of working with urgency |
| BMJ Leader – Dalton                | <a href="https://bmjleader.bmj.com/content/early/2020/05/18/leader-2020-000270">https://bmjleader.bmj.com/content/early/2020/05/18/leader-2020-000270</a>                                           | Compassion at the same time as top down | How to do it better | The possibilities and dangers of working with urgency |
| BMJ Leader – Mountford and Berendt | <a href="https://bmjleader.bmj.com/content/early/2020/05/04/leader-2020-000272">https://bmjleader.bmj.com/content/early/2020/05/04/leader-2020-000272</a>                                           | Compassion at the same time as top down | How to do it better | The possibilities and dangers of working with urgency |
| NHS Confederation – Allen et al    | <a href="https://www.nhsconfed.org/articles/equality-diversity-and-inclusion-time-crisis-and-beyond">https://www.nhsconfed.org/articles/equality-diversity-and-inclusion-time-crisis-and-beyond</a> | Compassion at the same time as top down | How to do it better | The possibilities and dangers of working with urgency |
| NHS Confederation – Allen et al    | <a href="https://www.nhsconfed.org/articles/equality-diversity-and-inclusion-time-crisis-and-beyond">https://www.nhsconfed.org/articles/equality-diversity-and-inclusion-time-crisis-and-beyond</a> | Decision making                         | How to do it better | The possibilities and dangers of working              |

|                                  |                                                                                                                                                                                                     |                                 |                     |                                                       |
|----------------------------------|-----------------------------------------------------------------------------------------------------------------------------------------------------------------------------------------------------|---------------------------------|---------------------|-------------------------------------------------------|
|                                  |                                                                                                                                                                                                     |                                 |                     | with urgency                                          |
| NHS Confederation – Allen et al  | <a href="https://www.nhsconfed.org/articles/equality-diversity-and-inclusion-time-crisis-and-beyond">https://www.nhsconfed.org/articles/equality-diversity-and-inclusion-time-crisis-and-beyond</a> | Diversity in decision making    | How to do it better | The possibilities and dangers of working with urgency |
| NHS Confederation – Allen et al  | <a href="https://www.nhsconfed.org/articles/equality-diversity-and-inclusion-time-crisis-and-beyond">https://www.nhsconfed.org/articles/equality-diversity-and-inclusion-time-crisis-and-beyond</a> | Diversity in command structures | How to do it better | The possibilities and dangers of working with urgency |
| NHS Confederation - Dickson      | <a href="https://www.nhsconfed.org/articles/nhs-reset-rethinking-future">https://www.nhsconfed.org/articles/nhs-reset-rethinking-future</a>                                                         | Clinicians                      | How to do it better | The possibilities and dangers of working with urgency |
| BMJ Leader – Wallace and Berendt | <a href="https://bmjleader.bmj.com/content/early/2020/05/06/leader-2020-000271">https://bmjleader.bmj.com/content/early/2020/05/06/leader-2020-000271</a>                                           | Need to balance                 | Impact on others    | The possibilities and dangers of working with urgency |
| Kings Fund – Trimble             | <a href="https://www.kingsfund.org.uk/blog/2020/05/impact-covid-19-working-relationships">https://www.kingsfund.org.uk/blog/2020/05/impact-covid-19-working-relationships</a>                       | Lack of Value                   | Impact on others    | The possibilities and dangers of working with urgency |
| Kings Fund – Trimble             | <a href="https://www.kingsfund.org.uk/blog/2020/05/impact-covid-19-working-relationships">https://www.kingsfund.org.uk/blog/2020/05/impact-covid-19-working-relationships</a>                       | voicelessness                   | Impact on others    | The possibilities and dangers of working with urgency |

| Publisher – author              | Link                                                                                                                                                                                                            | Code                                          | Sub theme           | theme                                           |
|---------------------------------|-----------------------------------------------------------------------------------------------------------------------------------------------------------------------------------------------------------------|-----------------------------------------------|---------------------|-------------------------------------------------|
| Kings Fund – Gilbert            | <a href="https://www.kingsfund.org.uk/blog/2020/04/volunteering-covid-19-crisis">https://www.kingsfund.org.uk/blog/2020/04/volunteering-covid-19-crisis</a>                                                     | Systems                                       | Systems description | Integrating and Mobilizing multi-agency systems |
| Kings Fund – Gordon and Goodman | <a href="https://www.kingsfund.org.uk/blog/2020/04/tackling-covid-19-outbreak-care-homes">https://www.kingsfund.org.uk/blog/2020/04/tackling-covid-19-outbreak-care-homes</a>                                   | Systems                                       | Systems description | Integrating and Mobilizing multi-agency systems |
| NHS Confederation – Kriby       | <a href="https://www.nhsconfed.org/articles/nhs-reset-reflections-and-learning-covid-19">https://www.nhsconfed.org/articles/nhs-reset-reflections-and-learning-covid-19</a>                                     | Innovations (as a product of systems working) | Systems description | Integrating and Mobilizing multi-agency systems |
| NHS Confederation - Tester      | <a href="https://www.nhsconfed.org/articles/nhs-reset-time-partnerships-we-always-needed">https://www.nhsconfed.org/articles/nhs-reset-time-partnerships-we-always-needed</a>                                   | Systems working                               | Systems description | Integrating and Mobilizing multi-agency systems |
| NHS Confederation – Pett        | <a href="https://www.nhsconfed.org/articles/nhs-reset-will-covid-19-be-remembered-catalyst-system-working">https://www.nhsconfed.org/articles/nhs-reset-will-covid-19-be-remembered-catalyst-system-working</a> | Systems working                               | Systems description | Integrating and Mobilizing multi-agency systems |
| NHS Confederation – Dickson     | <a href="https://www.nhsconfed.org/articles/nhs-reset-time-fix-plane-even-if-we-are-35000-feet">https://www.nhsconfed.org/articles/nhs-reset-time-fix-plane-even-if-we-are-35000-feet</a>                       | Systems working                               | Systems description | Integrating and Mobilizing multi-agency systems |
| NHS Confederation – Dickson     | <a href="https://www.nhsconfed.org/articles/how-do-nhs-leaders-feel-amid-crisis">https://www.nhsconfed.org/articles/how-do-nhs-leaders-feel-amid-crisis</a>                                                     | Systems working                               | Systems description | Integrating and Mobilizing multi-agency systems |
| NHS Confederation               | <a href="https://www.nhsconfed.org/articles/nhs-reset-working-together-reset-health-and-care">https://www.nhsconfed.org/articles/nhs-reset-working-together-reset-health-and-care</a>                           | Systems working                               | Systems description | Integrating and Mobilizing                      |

|                                     |                                                                                                                                                                                                                                                 |                                  |                     |                                                 |
|-------------------------------------|-------------------------------------------------------------------------------------------------------------------------------------------------------------------------------------------------------------------------------------------------|----------------------------------|---------------------|-------------------------------------------------|
| ion – Redmond                       |                                                                                                                                                                                                                                                 |                                  |                     | ng multi-agency systems                         |
| BMJ Leader – Geiger et al           | <a href="https://bmjleader.bmj.com/content/4/3/113">https://bmjleader.bmj.com/content/4/3/113</a>                                                                                                                                               | Systems working                  | Systems description | Integrating and Mobilizing multi-agency systems |
| BMJ Leader – Ciottone and Hertelend | <a href="https://bmjleader.bmj.com/content/4/3/154">https://bmjleader.bmj.com/content/4/3/154</a>                                                                                                                                               | Systems working across countries | Systems description | Integrating and Mobilizing multi-agency systems |
| BMJ Leader - Geerts                 | <a href="https://blogs.bmj.com/bmjleader/2020/04/30/leadership-lessons-and-hope-for-a-post-crisis-world-by-jaason-geerts/">https://blogs.bmj.com/bmjleader/2020/04/30/leadership-lessons-and-hope-for-a-post-crisis-world-by-jaason-geerts/</a> | Systems working                  | Systems description | Integrating and Mobilizing multi-agency systems |
| NHS Confederation – Jain            | <a href="https://www.nhsconfed.org/articles/nhs-reset-benefits-integration-during-covid-19">https://www.nhsconfed.org/articles/nhs-reset-benefits-integration-during-covid-19</a>                                                               | Lever for systems                | Systems description | Integrating and Mobilizing multi-agency systems |
| NHS Confederation – Jain            | <a href="https://www.nhsconfed.org/articles/nhs-reset-benefits-integration-during-covid-19">https://www.nhsconfed.org/articles/nhs-reset-benefits-integration-during-covid-19</a>                                                               | Diversity mattered for systems   | Systems description | Integrating and Mobilizing multi-agency systems |
| NHS Confederation - Dickson         | <a href="https://www.nhsconfed.org/articles/nhs-reset-rethinking-future">https://www.nhsconfed.org/articles/nhs-reset-rethinking-future</a>                                                                                                     | Rethinking systems               | Systems description | Integrating and Mobilizing multi-agency systems |
| BMJ Leader – Pandit and Berendt     | <a href="https://bmjleader.bmj.com/content/early/2020/05/25/leader-2020-000291">https://bmjleader.bmj.com/content/early/2020/05/25/leader-2020-000291</a>                                                                                       | Partnership working helpful      | Systems description | Integrating and Mobilizing multi-agency systems |

|                                  |                                                                                                                                                                                     |                      |                     |                                                 |
|----------------------------------|-------------------------------------------------------------------------------------------------------------------------------------------------------------------------------------|----------------------|---------------------|-------------------------------------------------|
| NHS Confederation - Dickson      | <a href="https://www.nhsconfed.org/articles/nhs-reset-reset-not-just-recovery">https://www.nhsconfed.org/articles/nhs-reset-reset-not-just-recovery</a>                             | Systems              | Systems description | Integrating and Mobilizing multi-agency systems |
| BMJ Leader – Pandit and Berendt  | <a href="https://bmjleader.bmj.com/content/early/2020/05/25/leader-2020-000291">https://bmjleader.bmj.com/content/early/2020/05/25/leader-2020-000291</a>                           | Common understanding | Underlying factors  | Integrating and Mobilizing multi-agency systems |
| BMJ Leader – Wallace and Berendt | <a href="https://bmjleader.bmj.com/content/early/2020/05/06/leader-2020-000273">https://bmjleader.bmj.com/content/early/2020/05/06/leader-2020-000273</a>                           | Networked working    | Underlying factors  | Integrating and Mobilizing multi-agency systems |
| BMJ Leader – Wallace and Berendt | <a href="https://bmjleader.bmj.com/content/early/2020/05/06/leader-2020-000273">https://bmjleader.bmj.com/content/early/2020/05/06/leader-2020-000273</a>                           | Collaboration        | Underlying factors  | Integrating and Mobilizing multi-agency systems |
| Kings Fund - Bailey and West     | <a href="https://www.kingsfund.org.uk/blog/2020/03/covid-19-crisis-compassionate-leadership">https://www.kingsfund.org.uk/blog/2020/03/covid-19-crisis-compassionate-leadership</a> | Providing clarity    | Underlying factors  | Integrating and Mobilizing multi-agency systems |
| Kings Fund - Harchowal           | <a href="https://www.kingsfund.org.uk/audio-video/common-purpose-culture-jatinder-harchowal">https://www.kingsfund.org.uk/audio-video/common-purpose-culture-jatinder-harchowal</a> | Shared purpose       | Underlying factors  | Integrating and Mobilizing multi-agency systems |
| Kings Fund - Oliver              | <a href="https://www.kingsfund.org.uk/blog/2020/04/covid-19-outbreak-tales-from-frontline">https://www.kingsfund.org.uk/blog/2020/04/covid-19-outbreak-tales-from-frontline</a>     | Common purpose       | Underlying factors  | Integrating and Mobilizing multi-agency systems |
| NHS confederation – Jain         | <a href="https://www.nhsconfed.org/articles/nhs-reset-benefits-integration-during-covid-19">https://www.nhsconfed.org/articles/nhs-reset-benefits-integration-during-covid-19</a>   | Shared understanding | Underlying factors  | Integrating and Mobilizing multi-agency         |

|                                                             |                                                                                                                                                                                                                               |                                                    |          |                                                 |
|-------------------------------------------------------------|-------------------------------------------------------------------------------------------------------------------------------------------------------------------------------------------------------------------------------|----------------------------------------------------|----------|-------------------------------------------------|
|                                                             |                                                                                                                                                                                                                               |                                                    |          | systems                                         |
| BMJ Leader - Stoller                                        | <a href="https://bmjleader.bmj.com/content/4/2/77">https://bmjleader.bmj.com/content/4/2/77</a>                                                                                                                               | Systems (clarify governance, communicate actively) | Enabler  | Integrating and Mobilizing multi-agency systems |
| BMJ Leader - Mayo                                           | <a href="https://bmjleader.bmj.com/content/4/2/53">https://bmjleader.bmj.com/content/4/2/53</a>                                                                                                                               | Systems (enabler)                                  | Enabler  | Integrating and Mobilizing multi-agency systems |
| BMJ Leader – Fung & Berendt                                 | <a href="https://bmjleader.bmj.com/content/4/2/87">https://bmjleader.bmj.com/content/4/2/87</a>                                                                                                                               | Systems (communication)                            | Enabler  | Integrating and Mobilizing multi-agency systems |
| BMJ Leader – Saint and Berendt                              | <a href="https://bmjleader.bmj.com/content/4/3/144">https://bmjleader.bmj.com/content/4/3/144</a>                                                                                                                             | Systems (Communication)                            | Enabler  | Integrating and Mobilizing multi-agency systems |
| Kings Fund - Humphries                                      | <a href="https://www.kingsfund.org.uk/blog/2020/04/health-social-care-covid-19-coronavirus">https://www.kingsfund.org.uk/blog/2020/04/health-social-care-covid-19-coronavirus</a>                                             | Enabler systems leadership                         | Enablers | Integrating and Mobilizing multi-agency systems |
| NHS confederation – Jain                                    | <a href="https://www.nhsconfed.org/articles/nhs-reset-benefits-integration-during-covid-19">https://www.nhsconfed.org/articles/nhs-reset-benefits-integration-during-covid-19</a>                                             | Sharing information                                | Enablers | Integrating and Mobilizing multi-agency systems |
| NHS Confederation – Health and social care select committee | <a href="https://www.nhsconfed.org/publications/delivering-core-nhs-and-care-services-during-pandemic-and-beyond">https://www.nhsconfed.org/publications/delivering-core-nhs-and-care-services-during-pandemic-and-beyond</a> | Technology use                                     | Enablers | Integrating and Mobilizing multi-agency systems |
| NHS Confederation                                           | <a href="https://www.nhsconfed.org/articles/nhs-reset-rethinking-future">https://www.nhsconfed.org/articles/nhs-reset-rethinking-future</a>                                                                                   | Business rules                                     | Enablers | Integrating and Mobilizing                      |

|                                                     |                                                                                                                                                           |                         |          |                                                                   |
|-----------------------------------------------------|-----------------------------------------------------------------------------------------------------------------------------------------------------------|-------------------------|----------|-------------------------------------------------------------------|
| ion -<br>Dickson                                    |                                                                                                                                                           |                         |          | ng multi-<br>agency<br>systems                                    |
| NHS<br>Confederat<br>ion –<br>clinical<br>directors | <a href="https://www.nhsconfed.org/articles/leading-ocns-through-pandemic">https://www.nhsconfed.org/articles/leading-ocns-through-pandemic</a>           | Embracing<br>technology | Enablers | Integrati<br>ng and<br>Mobilizi<br>ng multi-<br>agency<br>systems |
| NHS<br>Confederat<br>ion -<br>Dickson               | <a href="https://www.nhsconfed.org/articles/nhs-reset-rethinking-future">https://www.nhsconfed.org/articles/nhs-reset-rethinking-future</a>               | Joint<br>planning       | Enablers | Integrati<br>ng and<br>Mobilizi<br>ng multi-<br>agency<br>systems |
| BMJ leader<br>– Pandit<br>and<br>Berendt            | <a href="https://bmjleader.bmj.com/content/early/2020/05/25/leader-2020-000291">https://bmjleader.bmj.com/content/early/2020/05/25/leader-2020-000291</a> | Consistent<br>messaging | Enablers | Integrati<br>ng and<br>Mobilizi<br>ng multi-<br>agency<br>systems |

| Publisher -<br>author                 | Link                                                                                                                                                                                                      | Code                                            | Sub-<br>theme | Theme                                                       |
|---------------------------------------|-----------------------------------------------------------------------------------------------------------------------------------------------------------------------------------------------------------|-------------------------------------------------|---------------|-------------------------------------------------------------|
| NHS<br>Confederation<br>– Kirby       | <a href="https://www.nhsconfed.org/articles/nhs-reset-reflections-and-learning-covid-19">https://www.nhsconfed.org/articles/nhs-reset-reflections-and-learning-covid-19</a>                               | Inequality                                      |               | Leading<br>for<br>equality<br>diversity<br>and<br>inclusion |
| NHS<br>Confederation<br>- Dickson     | <a href="https://www.nhsconfed.org/articles/nhs-reset-daddy-and-mummy-what-did-you-do-great-corona-war">https://www.nhsconfed.org/articles/nhs-reset-daddy-and-mummy-what-did-you-do-great-corona-war</a> | More work<br>needed to<br>address<br>Inequality |               | Leading<br>for<br>equality<br>diversity<br>and<br>inclusion |
| NHS<br>Confederation<br>– Allen et al | <a href="https://www.nhsconfed.org/articles/equality-diversity-and-inclusion-time-crisis-and-beyond">https://www.nhsconfed.org/articles/equality-diversity-and-inclusion-time-crisis-and-beyond</a>       | More work<br>needed to<br>address<br>Inequality |               | Leading<br>for<br>equality<br>diversity<br>and<br>inclusion |
| Kings Fund -<br>Bailey and<br>West    | <a href="https://www.kingsfund.org.uk/blog/2020/04/ethnic-minority-deaths-covid-19">https://www.kingsfund.org.uk/blog/2020/04/ethnic-minority-deaths-covid-19</a>                                         | Symptom<br>s of deep<br>issues                  |               | Leading<br>for<br>equality<br>diversity                     |



|                   |                                                                                                                                                                                                                 |            |  |                                              |
|-------------------|-----------------------------------------------------------------------------------------------------------------------------------------------------------------------------------------------------------------|------------|--|----------------------------------------------|
|                   |                                                                                                                                                                                                                 |            |  | and inclusion                                |
| NHS Confederation | <a href="https://www.nhsconfed.org/publications/impact-covid-19-bme-communities-and-health-and-care-staff">https://www.nhsconfed.org/publications/impact-covid-19-bme-communities-and-health-and-care-staff</a> | Inequality |  | Leading for equality diversity and inclusion |

| Publisher – author               | Link                                                                                                                                                                                      | Code                             | Sub theme | theme                                 |
|----------------------------------|-------------------------------------------------------------------------------------------------------------------------------------------------------------------------------------------|----------------------------------|-----------|---------------------------------------|
| Kings fund – Bailey and West     | <a href="https://www.kingsfund.org.uk/blog/2020/03/covid-19-crisis-compassionate-leadership">https://www.kingsfund.org.uk/blog/2020/03/covid-19-crisis-compassionate-leadership</a>       | Flexibility                      |           | The importance of continuous learning |
| Kings fund – Bailey and West     | <a href="https://www.kingsfund.org.uk/blog/2020/03/covid-19-crisis-compassionate-leadership">https://www.kingsfund.org.uk/blog/2020/03/covid-19-crisis-compassionate-leadership</a>       | Learning                         |           | The importance of continuous learning |
| Kings Fund – Fenney and Wenzel   | <a href="https://www.kingsfund.org.uk/blog/2020/05/responding-covid-19">https://www.kingsfund.org.uk/blog/2020/05/responding-covid-19</a>                                                 | Adapting                         |           | The importance of continuous learning |
| Kings fund - Evans               | <a href="https://www.kingsfund.org.uk/audio-video/nurturing-leadership-navina-evans">https://www.kingsfund.org.uk/audio-video/nurturing-leadership-navina-evans</a>                       | Learning environment             |           | The importance of continuous learning |
| Kings Fund - Issar               | <a href="https://www.kingsfund.org.uk/audio-video/why-leadership-important-covid-prerana-issar">https://www.kingsfund.org.uk/audio-video/why-leadership-important-covid-prerana-issar</a> | Learning and improvement culture |           | The importance of continuous learning |
| BMJ leader – Lees and Berendt    | <a href="https://bmjleader.bmj.com/content/early/2020/04/30/leader-2020-000265">https://bmjleader.bmj.com/content/early/2020/04/30/leader-2020-000265</a>                                 | Need to learn                    |           | The importance of continuous learning |
| BMJ leader – Pandit and Berendt  | <a href="https://bmjleader.bmj.com/content/early/2020/05/25/leader-2020-000291">https://bmjleader.bmj.com/content/early/2020/05/25/leader-2020-000291</a>                                 | Need constantly adapting style   |           | The importance of continuous learning |
| BMJ leader – Wallace and Berendt | <a href="https://bmjleader.bmj.com/content/early/2020/05/06/leader-2020-000267">https://bmjleader.bmj.com/content/early/2020/05/06/leader-2020-000267</a>                                 | Every situation is different     |           | The importance of                     |

|                                  |                                                                                                                                                                                         |                  |  |                                       |
|----------------------------------|-----------------------------------------------------------------------------------------------------------------------------------------------------------------------------------------|------------------|--|---------------------------------------|
|                                  |                                                                                                                                                                                         |                  |  | continuous learning                   |
| BMJ leader – Wallace and Berendt | <a href="https://bmjleader.bmj.com/content/early/2020/05/06/leader-2020-000267">https://bmjleader.bmj.com/content/early/2020/05/06/leader-2020-000267</a>                               | Capture learning |  | The importance of continuous learning |
| NHS Confederation - Dickson      | <a href="https://www.nhsconfed.org/articles/nhs-reset-rethinking-future">https://www.nhsconfed.org/articles/nhs-reset-rethinking-future</a>                                             | Review plans     |  | The importance of continuous learning |
| NHS Confederation - Dickson      | <a href="https://www.nhsconfed.org/articles/nhs-reset-rethinking-future">https://www.nhsconfed.org/articles/nhs-reset-rethinking-future</a>                                             | Embrace learning |  | The importance of continuous learning |
| Kings Fund - Berwick             | <a href="https://www.kingsfund.org.uk/audio-video/don-berwick-adapting-changing-circumstances">https://www.kingsfund.org.uk/audio-video/don-berwick-adapting-changing-circumstances</a> | Adapting         |  | The importance of continuous learning |

**Thematic map iteration 3:**

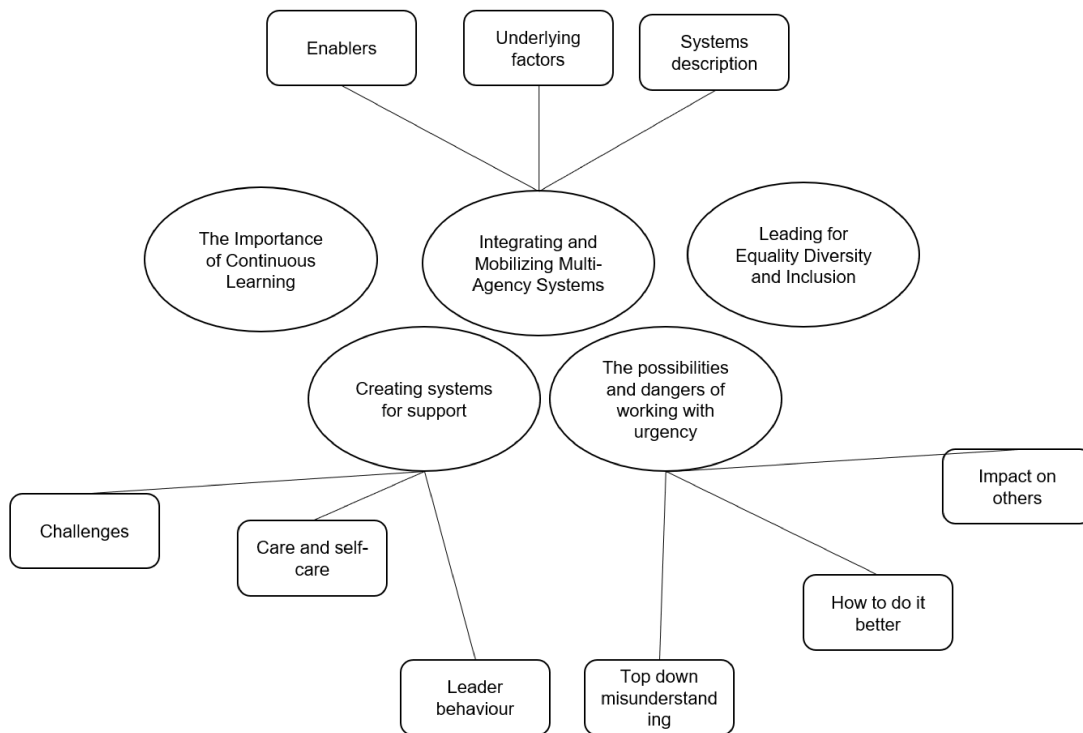

**Reference list for studies not used for the final article:**

Allwood D, Berendt T, Delgado P, Frinch J, Klaber B, Molloy A et al. This is different. *BMJ Leader* 2020;**4**:80-81.

Benson S. Managing anxiety: Breathing. *The Kings Fund* 2020 <https://www.kingsfund.org.uk/publications/managing-anxiety-breathing> (accessed 19 March 2021).

Berwick D. Responding to the COVID-19 crisis: Professor Don Berwick. *The Kings Fund* 2020 <https://www.kingsfund.org.uk/audio-video/don-berwick-responding-covid-19-crisis> (accessed 19 March 2021).

Berwick D. Adapting to changing circumstances: Professor Don Berwick. *The Kings Fund* 2020 <https://www.kingsfund.org.uk/audio-video/don-berwick-adapting-changing-circumstances> (accessed 19 March 2021).

Bullock I. Finding solutions in complex situations: Ian Bullock, Chief executive, Royal College of Physicians. *The Kings Fund* 2020. <https://www.kingsfund.org.uk/audio-video/finding-solutions-complex-situations> (accessed 19 March 2021).

Ciottone GR, Hertelendy A. Ten minutes with Dr Gregory R Ciottone, MD, FACEP, FFSEM, President of the World Association for Disaster and Emergency Medicine. *BMJ Leader* 2020 ;**4**:154-156.

Collins B. Discipline and agility in a crisis. *Kings Fund* 2020 <https://www.kingsfund.org.uk/publications/discipline-and-agility-crisis> (accessed 20 August 2021).

COVID Trauma Response Working Group. Responding to stress experienced by hospital staff working with COVID-19. *Kings Fund* 2020 <https://www.kingsfund.org.uk/audio-video/stress-hospital-staff-covid-19> (accessed 20 August 2021).

Dickson N. How do NHS leaders feel amid the crisis? *NHS Confederation* 2020 <https://www.nhsconfed.org/articles/how-do-nhs-leaders-feel-amid-crisis> (accessed 20 August 2021).

Dickson N. NHS Reset: Daddy (and Mummy), what did you do in the great Corona war? *NHS Confederation* 2020 <https://www.nhsconfed.org/articles/nhs-reset-daddy-and-mummy-what-did-you-do-great-corona-war> (accessed 20 August 2021).

Dickson N. NHS Reset: Reset, not just recovery: Niall Dickson. *NHS Confederation* 2020 <https://www.nhsconfed.org/articles/nhs-reset-reset-not-just-recovery> (accessed 21 August 2021).

Dickson N. NHS Reset: 'Time to fix the plane, even if we are at 35,000 feet'. *NHS Confederation* 2020 <https://www.nhsconfed.org/articles/nhs-reset-time-fix-plane-even-if-we-are-35000-feet> (accessed 20 August 2021).

Evans N. The nurturing role of leaders: Dr Navina Evans. *The Kings fund* 2020 <https://www.kingsfund.org.uk/audio-video/nurturing-leadership-navina-evans> (accessed 19 March 2021).

Fenney D, Wenzel L. Responding to Covid-19: What challenges are health and care leaders facing? *The Kings Fund* 2020 <https://www.kingsfund.org.uk/blog/2020/05/responding-covid-19> (accessed 19 March 2021).

Fung H, Berendt A. Ten minutes with Dr Hong Fung, CEO, Chinese University of Hong Kong Medical Centre. *BMJ Leader* 2020;**4**:87-89.

Geerts J. Leadership lessons and hope for a post-crisis world by Jaason Geerts. *BMJ Leader* 2020 <https://blogs.bmj.com/bmjleader/2020/04/30/leadership-lessons-and-hope-for-a-post-crisis-world-by-jaason-geerts/> (accessed 20 August 2020).

Geiger D, Harborth L, Mugyisha A. Managing enduring public health emergencies such as COVID-19: lessons from Uganda Red Cross Society's Ebola virus disease response operation. *BMJ Leader* 2020;**4**:113-116.

Gilbert H. Capitalising on the offer of help – volunteering in the COVID-19 crisis. *Kings Fund* 2020 <https://www.kingsfund.org.uk/blog/2020/04/volunteering-covid-19-crisis> (accessed 20 August 2021).

Gordon A, Goodman C. Tackling the COVID-19 outbreak in care homes: messages from a geriatrician and a health service researcher about how the NHS can help. *Kings Fund* 2020 <https://www.kingsfund.org.uk/blog/2020/04/tackling-covid-19-outbreak-care-homes> (accessed 20 August 2021).

Hardacre J, Margetts A. Psychological PPE: Survival kit for creating a safer culture in the COVID-19 context by Dr Jeanne Hardacre & Dr Alexander Margetts. *BMJ Leader* 2020 <https://blogs.bmj.com/bmjleader/2020/04/15/psychological-ppe-survival-kit-for-creating-a-safer-culture-in-the-covid-19-context/> (accessed 20 August 2021).

Kirby N. NHS Reset: Reflections and learning from COVID-19. *NHS Confederation* 2020 <https://www.nhsconfed.org/articles/nhs-reset-reflections-and-learning-covid-19> (accessed 20 August 2021).

Kumar J. Leadership in a crisis: The importance of courage and caring: Juliette Kumar. *NHS Confederation* 2020 <https://www.nhsconfed.org/articles/leadership-crisis-importance-courage-and-caring> (accessed 21 August 2021).

Lees P, Berendt AR. Ten minutes with Mr Peter Lees, CEO, Faculty of Medical Leadership and Management (FMLM). *BMJ Leader* 2020;**4**:149-150.

Maggs D. Resources supporting our mental health and wellbeing. *The Kings Fund* 2020 <https://www.kingsfund.org.uk/publications/resources-supporting-mental-health-covid19> (accessed 19 March 2021).

Marx C. Compassionate leadership is not a 'nice to have' – for clinicians confronting COVID-19, it is a powerful weapon by Dame Clare Marx. *BMJ Leader* 2020 <https://blogs.bmj.com/bmjleader/2020/04/15/compassionate-leadership-is-not-a-nice-to-have-for-clinicians-confronting-covid-19-it-is-a-powerful-weapon/> (accessed 20 August 2021).

Maybin J. Managing anxiety about loss. *The Kings Fund* 2020 <https://www.kingsfund.org.uk/publications/managing-anxiety-about-loss-covid-19> (accessed 19 March 2021).

Mayo AT. Teamwork in a pandemic: insights from management research. *BMJ Leader* 2020 ;4:53-56.

Newitt S. Managing your energy. *The Kings Fund* 2020 <https://www.kingsfund.org.uk/publications/managing-your-energy-covid19> (accessed 19 March 2021).

NHS Confederation. Delivering core NHS and care services during the pandemic and beyond. *NHS Confederation* 2020 <https://www.nhsconfed.org/publications/delivering-core-nhs-and-care-services-during-pandemic-and-beyond> (accessed 21 August 2021).

NHS Confederation BME Leadership Network. The impact of Covid-19 on BME communities and health and care staff. *NHS Confederation* 2020 <https://www.nhsconfed.org/publications/impact-covid-19-bme-communities-and-health-and-care-staff> (accessed 21 August 2021).

Ojo T. Mental Health Awareness for a week, then what? By Dr Tim Ojo. *BMJ Leader* 2020 <https://blogs.bmj.com/bmingleader/2020/05/20/mental-health-awareness-for-a-week-then-what-by-dr-tim-ojo/> (accessed 20 August 2021).

Oliver D. Tackling the Covid-19 outbreak: Tales from the frontline. *The Kings Fund* 2020 <https://www.kingsfund.org.uk/blog/2020/04/covid-19-outbreak-tales-from-frontline> (accessed 19 March).

PCN Clinical Directors. Leading PCNs through the pandemic: PCN network board members. *NHS Confederation* 2020 <https://www.nhsconfed.org/articles/leading-pcns-through-pandemic> (accessed 21 August 2021).

Pett W. NHS Reset: Will COVID-19 be remembered as the catalyst for system-working? *NHS Confederation* 2020 <https://www.nhsconfed.org/articles/nhs-reset-will-covid-19-be-remembered-catalyst-system-working> (Accessed 20 August 2021).

Reckless I, Berendt A. Ten minutes with Dr Ian Reckless, Medical Director, Milton Keynes University Hospital NHS Foundation Trust. *BMJ Leader* 2020;4:90-91.

Remond, I. NHS Reset: Working together to reset health and care. *NHS Confederation* 2020 <https://www.nhsconfed.org/articles/nhs-reset-working-together-reset-health-and-care> (accessed 20 August 2021).

Saint S, Berendt AR. 10 minutes with Sanjay Saint, Chief of Medicine, Veterans Administration Ann Arbor Healthcare System, Michigan, USA. *BMJ Leader* 2020;4:144-146.

Steward K. Maintaining humanity in the COVID-19 Crisis by Dr Katy Steward. *BMJ Leader* 2020 <https://blogs.bmj.com/bmingleader/2020/05/13/maintaining-humanity-in-the-covid-19-crisis-by-dr-katy-steward/> (accessed 20 August 2021).

Stoddart C, Berendt A. Ten minutes with Professor Catherine Stoddart, Chief Executive Officer, Northern Territory Health, Australia. *BMJ Leader* 2020;4:92-93.

Symons R. Decisions, decisions, decisions – Is the concept of decision fatigue an issue in COVID-19 Times? By Rita Symons. *BMJ Leader* 2020 <https://blogs.bmj.com/bmingleader/2020/05/06/decisions-decisions-decisions-is-the-concept-of-decision-fatigue-an-issue-in-covid-19-times-by-rita-symons/> (accessed 20 August 2021).

Tester N. NHS Reset: Time for the partnerships we always needed. *NHS Confederation* 2020 <https://www.nhsconfed.org/articles/nhs-reset-time-partnerships-we-always-needed> (accessed 20 August 2021).

Vogus TJ, McClelland LE. Actions, style and practices: how leaders ensure compassionate care delivery. *BMJ Leader* 2020;4:48-52.
